# Supplementary material
Source: Springer Nature journal article supplement (https://www.springermedizin.de/resource/supplementary/13256_2010_1459_MOESM1_ESM.pdf/9648888)

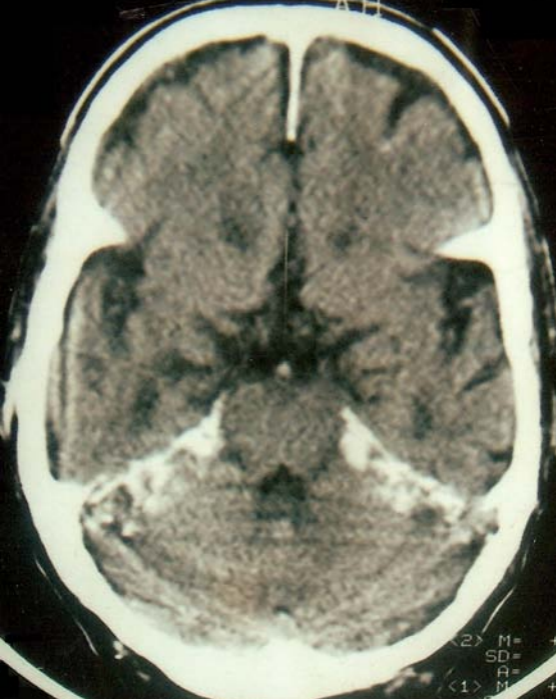

<2> M =  
SD =  
M =  
<1> M =

Supplement: MOESM1 [file 9648888]
